# Supplementary material
Source: PubMed Central journal article supplement (PMC4730871)
Supplement: NIHMS749829-supplement-Supp.pdf [file NIHMS749829-supplement-Supp.pdf]

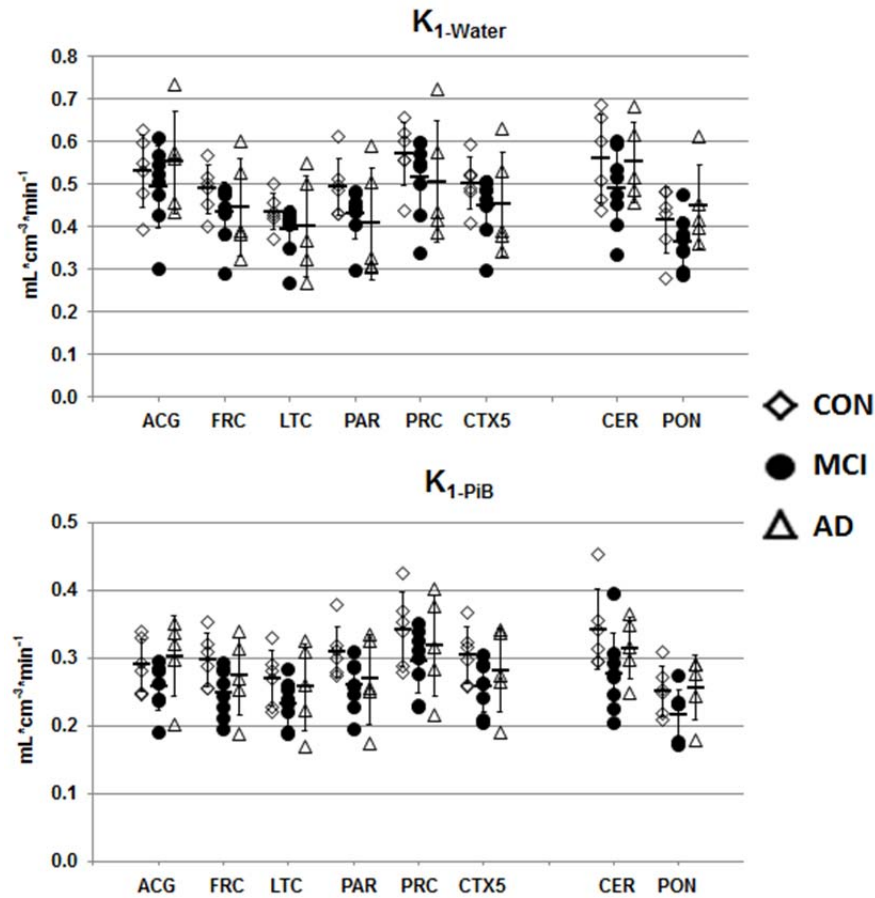

**SUPPLEMENTAL FIGURE 1**  $K_{1-Water}$  ( $\text{mL}\cdot\text{cm}^{-3}\cdot\text{min}^{-1}$ ) and  $K_{1-PiB}$  ( $\text{mL}\cdot\text{cm}^{-3}\cdot\text{min}^{-1}$ ) values (grouped by diagnosis with means and standard deviations) are shown for primary cortical regions (typically with significant beta-amyloid load in

AD) and CER and PON (usually without significant beta-amyloid deposition). Values are adjusted for CSF dilution. The AD subject with  $K_{I-Water}$  values higher than controls (CON) exhibited significant cortical atrophy, contributing to high  $K_{I-Water}$  values after correcting for CSF dilution.

**SUPPLEMENTAL TABLE 1** CSF Dilution Correction Factors

|                   |      | ACG   | FRC   | LTC   | PAR   | PRC   | CTX5  | CER   | PON   |
|-------------------|------|-------|-------|-------|-------|-------|-------|-------|-------|
| Controls<br>(n=6) | MEAN | 0.912 | 0.921 | 0.932 | 0.930 | 0.929 | 0.926 | 0.978 | 0.985 |
|                   | SD   | 0.083 | 0.038 | 0.030 | 0.053 | 0.059 | 0.045 | 0.028 | 0.017 |
| MCI<br>(n=8)      | MEAN | 0.808 | 0.857 | 0.897 | 0.872 | 0.843 | 0.859 | 0.958 | 0.990 |
|                   | SD   | 0.077 | 0.045 | 0.046 | 0.044 | 0.062 | 0.047 | 0.020 | 0.005 |
| AD<br>(n=5)       | MEAN | 0.819 | 0.878 | 0.899 | 0.896 | 0.841 | 0.870 | 0.966 | 0.990 |
|                   | SD   | 0.037 | 0.027 | 0.031 | 0.048 | 0.073 | 0.040 | 0.033 | 0.006 |
| Overall<br>(n=19) | MEAN | 0.844 | 0.882 | 0.909 | 0.897 | 0.870 | 0.883 | 0.966 | 0.988 |
|                   | SD   | 0.083 | 0.046 | 0.039 | 0.052 | 0.073 | 0.052 | 0.026 | 0.010 |

SD=standard deviation

**SUPPLEMENTAL TABLE 2** Correlation Between Delivery Parameters and <sup>11</sup>C-PiB Retention\* †

| ROI  | Spearman's rho (p-value)       |         |           |         |           |         |        |         |           |         |
|------|--------------------------------|---------|-----------|---------|-----------|---------|--------|---------|-----------|---------|
|      | 2T-4k-DVR                      |         | ART90-DVR |         | CER90-DVR |         | SUVR70 |         | SRTM2-DVR |         |
|      | <i>K<sub>I-Water</sub></i>     |         |           |         |           |         |        |         |           |         |
| ACG  | 0.038                          | (0.888) | 0.075     | (0.759) | 0.123     | (0.616) | 0.100  | (0.684) | 0.140     | (0.567) |
| FRC  | -0.353                         | (0.180) | -0.249    | (0.303) | -0.104    | (0.673) | -0.135 | (0.581) | -0.101    | (0.681) |
| LTC  | -0.263                         | (0.324) | -0.213    | (0.380) | -0.098    | (0.689) | -0.113 | (0.644) | -0.097    | (0.694) |
| PAR  | -0.429                         | (0.097) | -0.442    | (0.058) | -0.253    | (0.297) | -0.327 | (0.171) | -0.272    | (0.260) |
| PRC  | -0.259                         | (0.333) | -0.319    | (0.183) | -0.189    | (0.437) | -0.242 | (0.318) | -0.288    | (0.232) |
| CTX5 | -0.341                         | (0.196) | -0.281    | (0.244) | -0.093    | (0.705) | -0.130 | (0.596) | -0.093    | (0.705) |
| MTC  | -0.368                         | (0.161) | -0.111    | (0.652) | -0.054    | (0.825) | -0.086 | (0.726) | 0.052     | (0.833) |
| OCC  | -0.113                         | (0.676) | -0.224    | (0.357) | -0.414    | (0.078) | -0.383 | (0.106) | -0.495    | (0.031) |
| OCP  | -0.109                         | (0.688) | -0.238    | (0.327) | -0.280    | (0.246) | -0.275 | (0.255) | -0.432    | (0.065) |
| SMC  | 0.082                          | (0.762) | 0.029     | (0.906) | 0.060     | (0.808) | 0.126  | (0.606) | 0.086     | (0.726) |
| AVS  | -0.422                         | (0.103) | -0.254    | (0.295) | -0.158    | (0.518) | -0.183 | (0.454) | -0.118    | (0.629) |
| SWM  | -0.013                         | (0.961) | -0.098    | (0.689) | 0.421     | (0.072) | 0.459  | (0.048) | 0.067     | (0.786) |
| PON  | -0.521                         | (0.039) | -0.533    | (0.019) | -0.374    | (0.115) | -0.335 | (0.161) | -0.077    | (0.753) |
| THL  | -0.393                         | (0.132) | -0.288    | (0.232) | -0.146    | (0.551) | -0.221 | (0.364) | -0.107    | (0.662) |
| CER  | 0.071                          | (0.795) | 0.147     | (0.547) | N/A       | N/A     | 0.156  | (0.523) | N/A       | N/A     |
|      | <i>Rel-K<sub>I-Water</sub></i> |         |           |         |           |         |        |         |           |         |
| ACG  | 0.485                          | (0.057) | 0.404     | (0.087) | 0.386     | (0.103) | 0.379  | (0.110) | 0.354     | (0.137) |
| FRC  | 0.324                          | (0.222) | 0.230     | (0.344) | 0.239     | (0.325) | 0.196  | (0.420) | 0.167     | (0.495) |
| LTC  | 0.241                          | (0.368) | 0.204     | (0.403) | 0.175     | (0.473) | 0.154  | (0.528) | 0.096     | (0.694) |
| PAR  | 0.259                          | (0.333) | 0.060     | (0.808) | 0.068     | (0.781) | 0.063  | (0.797) | -0.011    | (0.966) |
| PRC  | 0.379                          | (0.147) | 0.154     | (0.528) | 0.144     | (0.557) | 0.139  | (0.571) | 0.058     | (0.814) |
| CTX5 | 0.326                          | (0.217) | 0.160     | (0.514) | 0.202     | (0.408) | 0.189  | (0.437) | 0.132     | (0.591) |
| MTC  | 0.082                          | (0.762) | 0.449     | (0.054) | 0.409     | (0.082) | 0.416  | (0.076) | 0.335     | (0.161) |

|                        |              |                    |              |                    |              |                    |              |                    |              |                    |
|------------------------|--------------|--------------------|--------------|--------------------|--------------|--------------------|--------------|--------------------|--------------|--------------------|
| OCC                    | 0.426        | (0.099)            | -0.018       | (0.943)            | -0.028       | (0.909)            | -0.074       | (0.764)            | -0.200       | (0.412)            |
| OCP                    | 0.650        | (0.006)            | 0.195        | (0.424)            | 0.084        | (0.732)            | 0.100        | (0.684)            | -0.061       | (0.803)            |
| SMC                    | *0.706       | (0.002)            | 0.544        | (0.016)            | 0.593        | (0.007)            | 0.549        | (0.015)            | 0.468        | (0.043)            |
| AVS                    | 0.374        | (0.154)            | 0.176        | (0.470)            | 0.276        | (0.254)            | 0.268        | (0.268)            | 0.243        | (0.316)            |
| SWM                    | 0.256        | (0.338)            | 0.111        | (0.652)            | 0.427        | (0.069)            | 0.462        | (0.046)            | 0.324        | (0.176)            |
| PON                    | -0.128       | (0.637)            | 0.025        | (0.918)            | 0.043        | (0.861)            | -0.055       | (0.822)            | 0.239        | (0.325)            |
| THL                    | 0.389        | (0.137)            | 0.287        | (0.233)            | 0.221        | (0.363)            | 0.217        | (0.373)            | 0.235        | (0.332)            |
| Rel-K <sub>1-PiB</sub> |              |                    |              |                    |              |                    |              |                    |              |                    |
| ACG                    | <b>0.856</b> | <b>(&lt;0.001)</b> | <b>0.791</b> | <b>(&lt;0.001)</b> | <b>0.811</b> | <b>(&lt;0.001)</b> | <b>0.825</b> | <b>(&lt;0.001)</b> | <b>0.819</b> | <b>(&lt;0.001)</b> |
| FRC                    | 0.450        | (0.080)            | 0.458        | (0.049)            | 0.539        | (0.017)            | 0.504        | (0.028)            | 0.500        | (0.029)            |
| LTC                    | 0.253        | (0.344)            | 0.361        | (0.129)            | 0.484        | (0.036)            | 0.467        | (0.044)            | 0.458        | (0.049)            |
| PAR                    | 0.116        | (0.668)            | 0.124        | (0.614)            | 0.301        | (0.210)            | 0.240        | (0.322)            | 0.279        | (0.247)            |
| PRC                    | 0.415        | (0.110)            | 0.391        | (0.098)            | 0.460        | (0.048)            | 0.442        | (0.058)            | 0.389        | (0.099)            |
| CTX5                   | 0.447        | (0.083)            | 0.426        | (0.069)            | 0.528        | (0.020)            | 0.516        | (0.024)            | 0.533        | (0.019)            |
| MTC                    | 0.162        | (0.549)            | 0.627        | (0.004)            | <b>0.829</b> | <b>(&lt;0.001)</b> | <b>0.845</b> | <b>(&lt;0.001)</b> | <b>0.824</b> | <b>(&lt;0.001)</b> |
| OCC                    | 0.109        | (0.688)            | 0.128        | (0.601)            | 0.212        | (0.383)            | 0.140        | (0.567)            | 0.012        | (0.960)            |
| OCP                    | 0.424        | (0.102)            | 0.487        | (0.034)            | 0.551        | (0.015)            | 0.547        | (0.015)            | 0.354        | (0.137)            |
| SMC                    | 0.571        | (0.021)            | <b>0.656</b> | <b>(0.002)</b>     | <b>0.812</b> | <b>(&lt;0.001)</b> | <b>0.733</b> | <b>(&lt;0.001)</b> | <b>0.756</b> | <b>(&lt;0.001)</b> |
| AVS                    | <b>0.688</b> | <b>(0.003)</b>     | 0.551        | (0.015)            | <b>0.656</b> | <b>(0.002)</b>     | <b>0.667</b> | <b>(0.002)</b>     | 0.621        | (0.005)            |
| SWM                    | 0.053        | (0.846)            | 0.040        | (0.870)            | 0.623        | (0.004)            | 0.533        | (0.019)            | 0.196        | (0.420)            |
| PON                    | -0.049       | (0.858)            | 0.306        | (0.202)            | 0.387        | (0.102)            | 0.289        | (0.231)            | 0.419        | (0.074)            |
| THL                    | 0.228        | (0.395)            | 0.421        | (0.073)            | 0.529        | (0.020)            | 0.498        | (0.030)            | 0.547        | (0.015)            |
| SRTM2-R <sub>l</sub>   |              |                    |              |                    |              |                    |              |                    |              |                    |
| ACG                    | <b>0.868</b> | <b>(&lt;0.001)</b> | <b>0.805</b> | <b>(&lt;0.001)</b> | <b>0.819</b> | <b>(&lt;0.001)</b> | <b>0.830</b> | <b>(&lt;0.001)</b> | <b>0.818</b> | <b>(&lt;0.001)</b> |
| FRC                    | 0.588        | (0.017)            | 0.502        | (0.029)            | 0.568        | (0.011)            | 0.535        | (0.018)            | 0.530        | (0.020)            |
| LTC                    | 0.235        | (0.380)            | 0.384        | (0.104)            | 0.482        | (0.036)            | 0.467        | (0.044)            | 0.475        | (0.040)            |
| PAR                    | 0.153        | (0.572)            | 0.091        | (0.710)            | 0.256        | (0.290)            | 0.213        | (0.380)            | 0.237        | (0.329)            |
| PRC                    | 0.488        | (0.055)            | 0.335        | (0.161)            | 0.411        | (0.081)            | 0.386        | (0.103)            | 0.335        | (0.161)            |
| CTX5                   | 0.434        | (0.093)            | 0.385        | (0.103)            | 0.481        | (0.037)            | 0.469        | (0.043)            | 0.489        | (0.034)            |

|     |        |         |        |         |              |                    |              |                |              |                |
|-----|--------|---------|--------|---------|--------------|--------------------|--------------|----------------|--------------|----------------|
| MTC | -0.076 | (0.778) | 0.453  | (0.052) | <b>0.702</b> | <b>(0.001)</b>     | <b>0.650</b> | <b>(0.003)</b> | <b>0.704</b> | <b>(0.001)</b> |
| OCC | 0.015  | (0.957) | -0.072 | (0.770) | 0.082        | (0.737)            | 0.032        | (0.898)        | -0.065       | (0.792)        |
| OCP | 0.535  | (0.033) | 0.343  | (0.150) | 0.423        | (0.071)            | 0.425        | (0.070)        | 0.249        | (0.304)        |
| SMC | 0.556  | (0.025) | 0.585  | (0.008) | <b>0.786</b> | <b>(&lt;0.001)</b> | <b>0.688</b> | <b>(0.001)</b> | <b>0.711</b> | <b>(0.001)</b> |
| AVS | 0.588  | (0.017) | 0.321  | (0.180) | 0.446        | (0.056)            | 0.419        | (0.074)        | 0.414        | (0.078)        |
| SWM | -0.003 | (0.991) | 0.098  | (0.689) | 0.626        | (0.004)            | 0.490        | (0.033)        | 0.461        | (0.047)        |
| PON | -0.265 | (0.322) | 0.139  | (0.571) | 0.312        | (0.193)            | 0.147        | (0.547)        | 0.409        | (0.082)        |
| THL | 0.138  | (0.610) | 0.330  | (0.168) | 0.470        | (0.042)            | 0.416        | (0.077)        | 0.511        | (0.026)        |

\*Statistically significant correlations in bold, threshold of  $p < 0.0036$  after Bonferroni correction

†Measures adjusted for CSF dilution
